# Supplementary material for: In situ growth of carbon dots on TiO2 nanotube arrays for PEC enzyme biosensors with visible light response
Source: Royal Society of Chemistry journal article supplement (doi:10.1039/c9ra01045a), 2019-01-01
Supplement: c9ra01045a1.pdf [file c9ra01045a1.pdf]

## Supporting Information

### **In situ Growth of Carbon Dots on TiO<sub>2</sub> Nanotube Array for PEC Enzyme Biosensors with Visible Light Response**

Cheng He<sup>a</sup>, Linkai Peng, Linzhe Lv, Yang Cao<sup>a, b</sup>, Jinchun Tu<sup>a</sup>, Wei Huang<sup>a,\*</sup>, and  
Kexi Zhang<sup>a,\*</sup>

<sup>a</sup> *State Key Laboratory of Marine Resource Utilization in South China Sea, Key Laboratory of Tropical Biological Resources of Ministry of Education Hainan University, Haikou 570228, P. R. China;*

<sup>b</sup> *Qiongtai Normal University, Haikou 570228, P. R. China.*

---

\* Corresponding author. E-mail address: hw\_hnu@aliyun.com

\* Corresponding author. E-mail address: zhangkexi@hainu.edu.cn

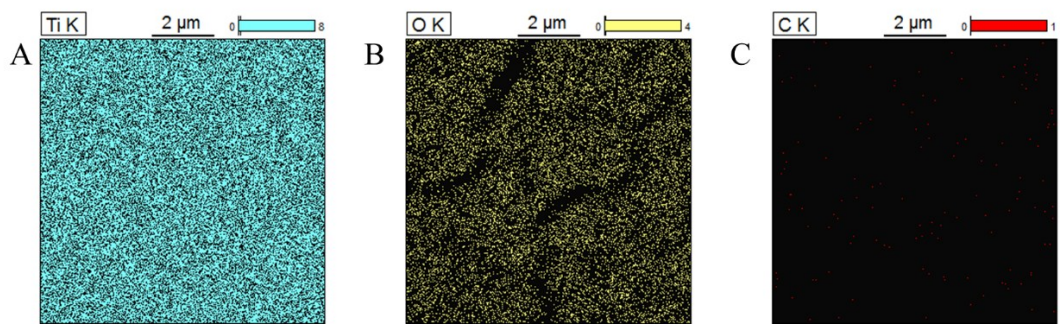

Fig. S1 (A) Ti, (B) O, and (C) C elements Mapping of the CDs/TiO<sub>2</sub> TNAs.
